# Supplementary material for: Chemical order or disorder – a theoretical stability expose for expanding the compositional space of quaternary metal borides
Source: Royal Society of Chemistry journal article supplement (doi:10.1039/d1ma01076j), 2022-01-01
Supplement: d1ma01076j1.pdf [file d1ma01076j1.pdf]

## Supporting information for

# Chemical order or disorder - A theoretical stability expose for expanding the compositional space of quaternary metal borides

Martin Dahlgvist\*, Johanna Rosen\*

*Materials Design, Department of Physics, Chemistry and Biology (IFM), Linköping University,  
SE-581 83 Linköping, Sweden*

\* corresponding authors: martin.dahlgvist@liu.se; johanna.rosen@liu.se

This PDF file contains:

Schematic illustration of considered magnetic configurations for quaternary chemically ordered *o*-MAB phases (Figure S1)

Convergence test for plane-wave energy cut-off and k-point density (Figure S2).

Convergence test for size of supercells used to model chemical disorder, solid solution, for  $(M'_{1-x}M''_x)_5AB_2$  MAB phases (Figure S3).

Calculated formation enthalpy as function of formation energy for  $M_5AB_2$  phases (Figure S4).

Calculated formation enthalpy and identified equilibrium simplex for  $M_5AB_2$  phases (Table S1).

Experimentally known ternary MAB phases (Table S2), quaternary solid solution MAB phases (Table S3) and quaternary chemically ordered *o*-MAB phases (Table S4).

Calculated thermodynamic stability of quaternary MAB phases evaluated at 0 K (Figure S5).

List of theoretically predicted stable *o*-MAB phases at 2000 K (Table S5).

List of theoretically predicted stable disorder solid solution MAB phases at 2000 K (Table S6).

Detailed structural information for *o*-MAB phases predicted stable (Table S7).

Atomic radius and electronegativity for considered *M* and *A* elements (Table S8).

Energy difference of *o*-MAB and disorder MAB compared with electronegativity of the metals (Figure S6).

Electronegativity difference as function of size difference for MAX phases (Figure S7).

Energy difference of *o*-MAB and disorder MAB compared with atomic size of the metals (Figure S8).

Calculated lattice parameters *a* and *c* colored based on the calculated stability (Figure S9).

Calculated lattice parameters *a* and *c* colored based on the size difference of the metals (Figure S10).

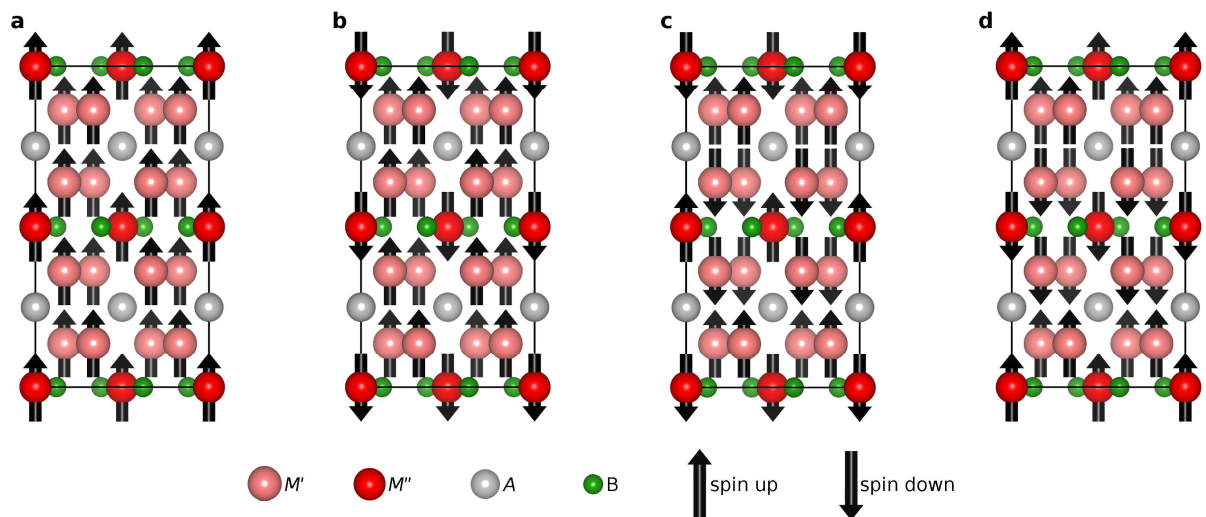

Figure S1. Schematic illustration of considered magnetic spin configurations for *o*-MAB phases. (a) FM, (b) AFM1, (c) AFM2, and (d) AFM3. These spin configurations were also modeled for structures with a disordered distribution of  $M'$  and  $M''$  in a larger supercell (not shown here).

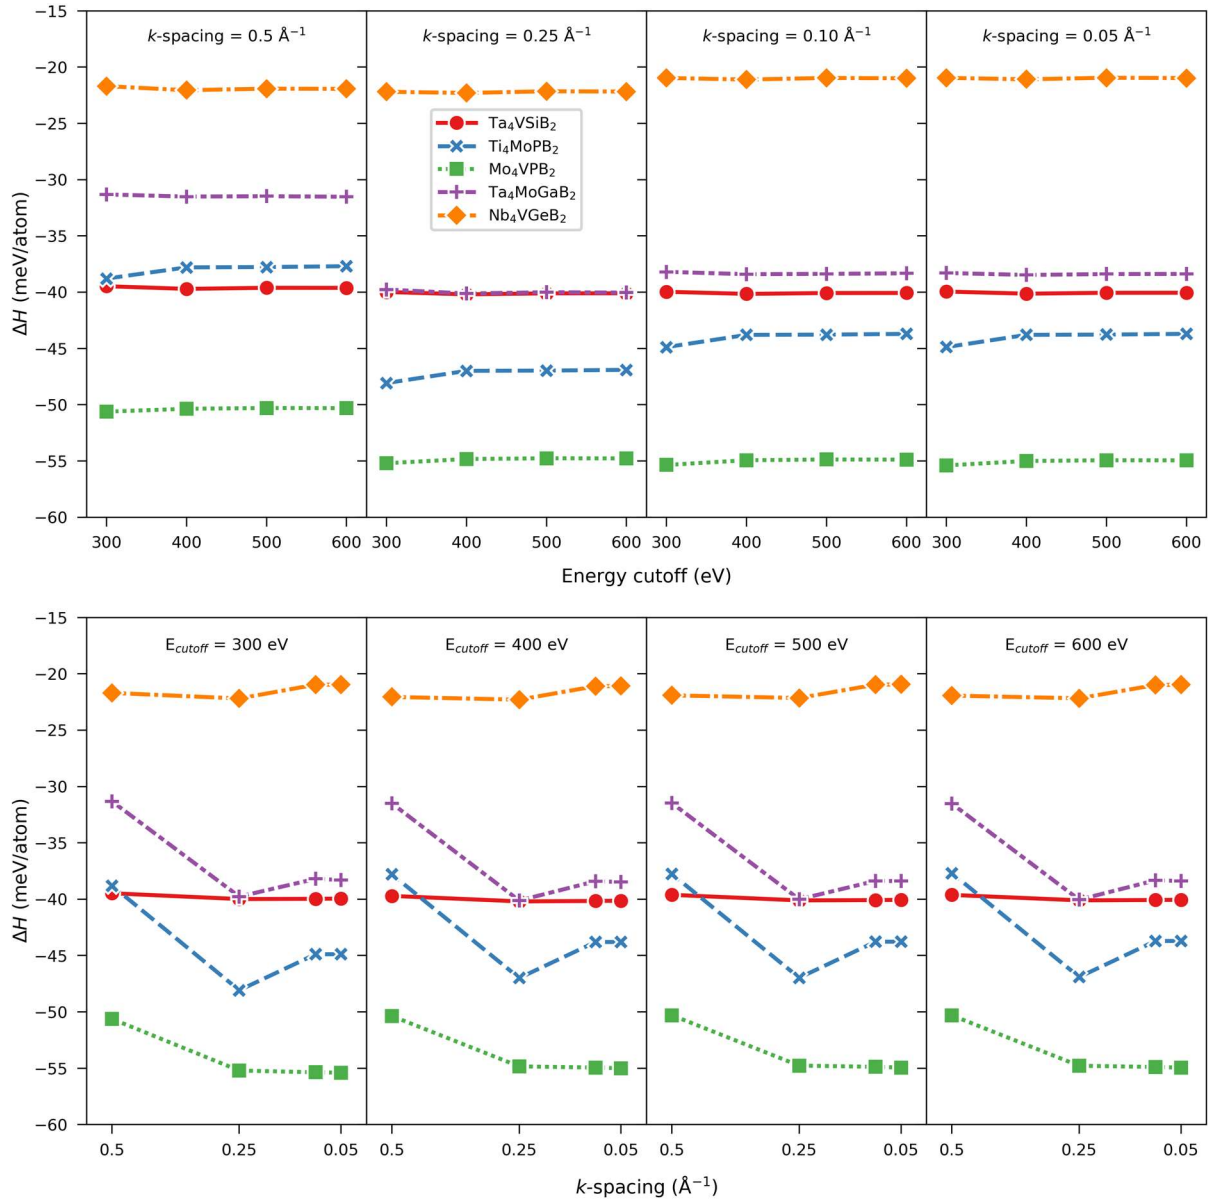

Figure S2. Demonstration for convergence of formation enthalpy  $\Delta H_{cp}$  for five different *o*-MAB phases. Top panels show  $\Delta H_{cp}$  as function of plane wave energy cutoff using four different  $k$ -point densities for the *o*-MAB phase and its competing phases. Bottom panels show  $\Delta H_{cp}$  as function of  $k$ -point density for different plane wave energy cutoffs for the *o*-MAB phase and its competing phases. Using a plane wave energy cutoff of 400 eV combined with a  $k$ -point density of  $0.05 \text{ \AA}^{-1}$  ensures  $\Delta H_{cp}$  values within less than 0.5 meV/atom as compared to using larger cutoff energies or denser  $k$ -point meshes.

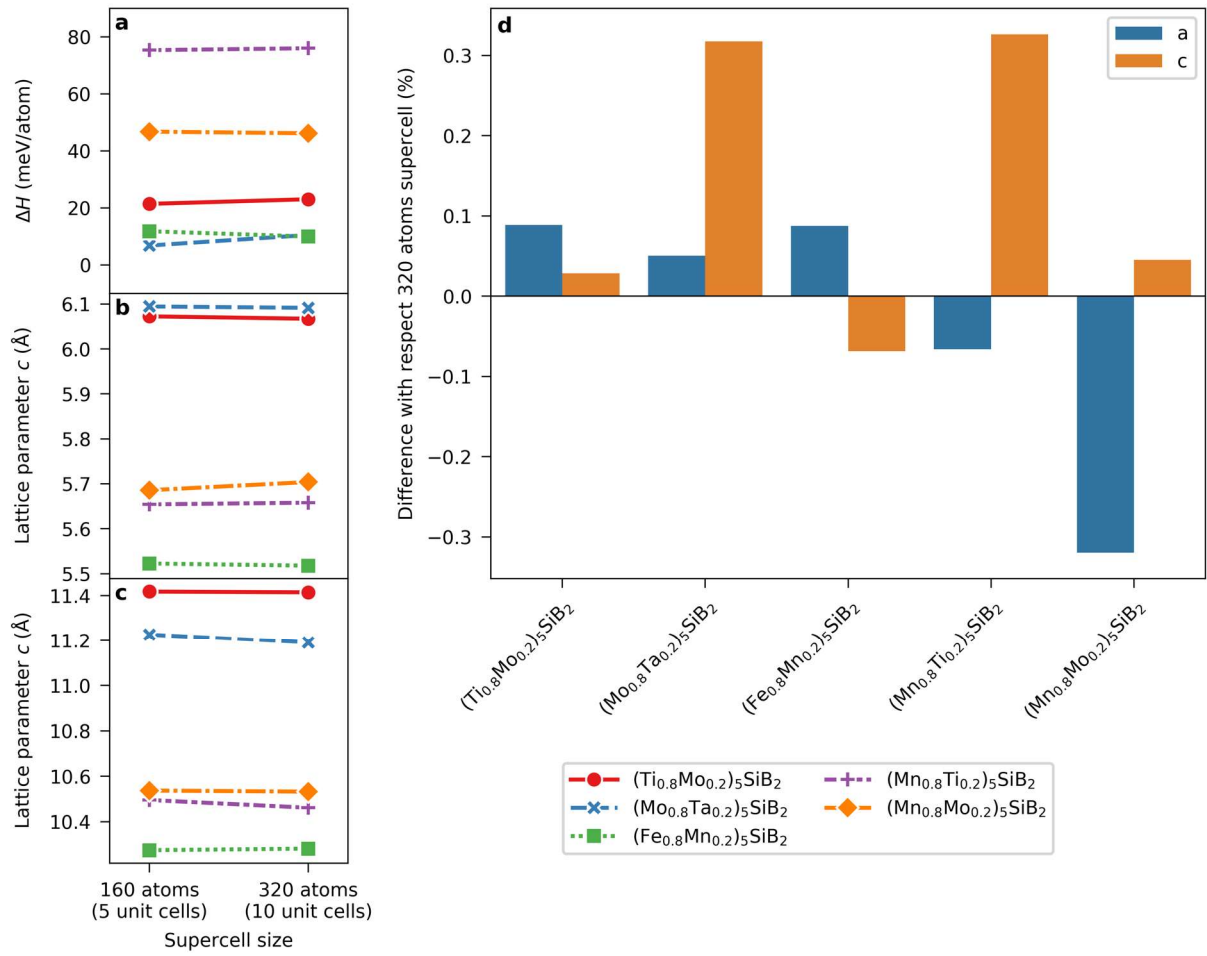

Figure S3. Size convergence of supercells used for modeling chemical disorder in  $(M'_{0.8}M''_{0.2})_5AB_2$ . (a) Formation  $\Delta H_{cp}$  enthalpy at 0 K, (b) lattice parameter  $a$ , (c) lattice parameter  $c$  as function of supercell size for five different compositions of  $(M'_{0.8}M''_{0.2})_5AB_2$ . (d) Deviation of lattice parameters  $a$  and  $c$  for the smaller supercell size consisting of 160 atoms as compared to the larger supercell of 320 atoms.

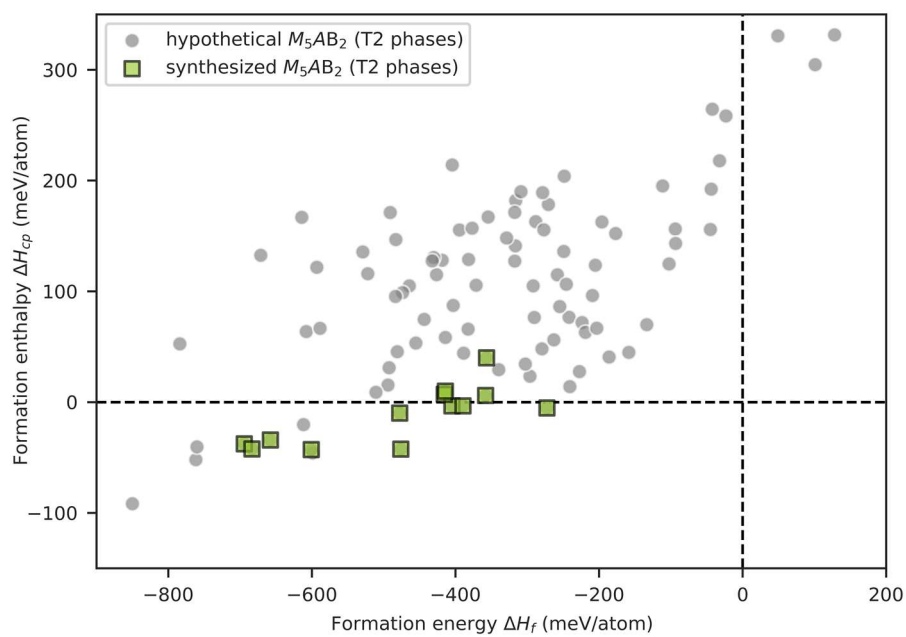

Figure S4. Calculated formation enthalpy as function of formation energy for  $M_5AB_2$  phases. Experimentally reported  $M_5AB_2$  phases are represented by green squares and hypothetical  $M_5AB_2$  by grey circles.

Table S1. Calculated formation enthalpy  $\Delta H_{cp}$  (in meV/atom) and identified equilibrium simplex for  $M_5AB_2$  phases. Experimentally known  $M_5AB_2$  phases are marked in bold.

| <i>M</i>  | <i>A</i> | $\Delta H_{cp}$ (meV/atom)  | Equilibrium simplex                                                                   | <i>M</i>  | <i>A</i>    | $\Delta H_{cp}$ (meV/atom) | Equilibrium simplex                                                                   |
|-----------|----------|-----------------------------|---------------------------------------------------------------------------------------|-----------|-------------|----------------------------|---------------------------------------------------------------------------------------|
| Sc        |          | 127                         | Sc, ScB <sub>2</sub> , Sc <sub>2</sub> Al                                             | Sc        |             | 95                         | Sc, ScB <sub>2</sub> , Sc <sub>5</sub> Ge <sub>3</sub>                                |
| Y         |          | 152                         | Y, YB <sub>2</sub> , Y <sub>2</sub> Al                                                | Y         |             | 171                        | Y, YB <sub>2</sub> , Y <sub>5</sub> Ge <sub>3</sub>                                   |
| Ti        |          | 155                         | TiB, Ti <sub>3</sub> Al                                                               | Ti        |             | 67                         | TiB, Ti <sub>6</sub> Ge <sub>2</sub> B, Ti                                            |
| Zr        |          | 167                         | Zr <sub>2</sub> B, Zr <sub>3</sub> Al, Zr                                             | Zr        |             | 116                        | Zr, ZrB <sub>2</sub> , Zr <sub>5</sub> Ge <sub>3</sub>                                |
| Hf        |          | 182                         | Hf, HfB <sub>2</sub> , Hf <sub>4</sub> Al <sub>3</sub>                                | Hf        |             | 147                        | Hf, HfB <sub>2</sub> , Hf <sub>2</sub> Ge                                             |
| V         |          | 75                          | V <sub>3</sub> B <sub>2</sub> , V <sub>3</sub> Al, VAl <sub>3</sub>                   | V         |             | -20                        | VB, V <sub>3</sub> Ge                                                                 |
| Nb        | Al       | 53                          | Nb <sub>3</sub> B <sub>2</sub> , Nb <sub>2</sub> Al                                   | Nb        | Ge          | -46                        | Nb <sub>3</sub> B <sub>2</sub> , Nb <sub>5</sub> Ge <sub>3</sub> , Nb                 |
| Ta        |          | 45                          | Ta <sub>3</sub> B <sub>2</sub> , Ta <sub>2</sub> Al                                   | <b>Ta</b> |             | <b>-43</b>                 | Ta <sub>3</sub> B <sub>2</sub> , Ta <sub>5</sub> Ge <sub>3</sub> , Ta <sub>3</sub> Ge |
| Cr        |          | 124                         | Cr <sub>2</sub> Al, Cr <sub>5</sub> B <sub>3</sub> , Cr <sub>2</sub> AlB <sub>2</sub> | Cr        |             | 56                         | CrB, Cr <sub>3</sub> Ge                                                               |
| Mo        |          | 76                          | MoB, Mo <sub>3</sub> Al                                                               | Mo        |             | 23                         | MoB, Mo <sub>3</sub> Ge                                                               |
| W         |          | 41                          | W <sub>2</sub> B, W, WAl <sub>5</sub>                                                 | W         |             | 70                         | W <sub>2</sub> B, W, Ge                                                               |
| Mn        |          | 115                         | Mn <sub>2</sub> B, MnAl                                                               | Mn        |             | 34                         | Mn <sub>2</sub> B, MnGe                                                               |
| Fe        |          | 77                          | Fe <sub>2</sub> B, FeAl                                                               | Fe        |             | 14                         | Fe <sub>2</sub> B, FeGe                                                               |
| Co        |          | 106                         | CoB, Co, CoAl                                                                         | Co        |             | 28                         | Co <sub>2</sub> B, CoGe                                                               |
| Sc        |          | 105                         | Sc, ScB <sub>2</sub> , Sc <sub>5</sub> Si <sub>3</sub>                                | Sc        |             | 141                        | ScB <sub>2</sub> , Sc <sub>3</sub> In, Sc                                             |
| Y         |          | 163                         | Y, YB <sub>2</sub> , Y <sub>5</sub> Si <sub>3</sub>                                   | Y         |             | 163                        | Y, YB <sub>2</sub> , Y <sub>2</sub> In                                                |
| Ti        |          | 64                          | TiB, Ti <sub>6</sub> Si <sub>2</sub> B, Ti                                            | Ti        |             | 148                        | TiB, Ti <sub>3</sub> In                                                               |
| Zr        |          | 135                         | Zr, Zr <sub>2</sub> Si, ZrB <sub>2</sub>                                              | Zr        |             | 190                        | ZrB <sub>2</sub> , Zr <sub>3</sub> In, Zr                                             |
| Hf        |          | 171                         | Hf, HfB <sub>2</sub> , Hf <sub>2</sub> Si                                             | Hf        |             | 178                        | Hf, Hf <sub>2</sub> InB <sub>2</sub>                                                  |
| <b>V</b>  | Si       | <b>-38</b>                  | V <sub>3</sub> B <sub>2</sub> , V <sub>5</sub> Si <sub>3</sub> , V <sub>3</sub> Si    | V         | In          | 204                        | V, In, V <sub>3</sub> B <sub>2</sub>                                                  |
| <b>Nb</b> |          | <b>-34</b>                  | Nb <sub>3</sub> B <sub>2</sub> , Nb <sub>5</sub> Si <sub>3</sub> , Nb                 | Nb        |             | 105                        | Nb, In, Nb <sub>3</sub> B <sub>2</sub>                                                |
| <b>Ta</b> |          | <b>-42</b>                  | Ta <sub>2</sub> Si, Ta <sub>3</sub> B <sub>2</sub>                                    | Ta        |             | 156                        | Ta, In, Ta <sub>3</sub> B <sub>2</sub>                                                |
| Cr        |          | 44                          | CrB, Cr <sub>3</sub> Si                                                               | Cr        |             | 331                        | Cr <sub>2</sub> B, Cr, In                                                             |
| <b>Mo</b> |          | <b>-3</b>                   | MoB, Mo <sub>3</sub> Si                                                               | Mo        |             | 218                        | Mo, MoB, In                                                                           |
| <b>W</b>  |          | <b>-5</b>                   | W <sub>2</sub> B, WSi <sub>2</sub> , W                                                | W         |             | 331                        | W <sub>2</sub> B, W, In                                                               |
| <b>Mn</b> |          | <b>7</b>                    | Mn <sub>2</sub> B, MnSi                                                               | Mn        |             | 264                        | Mn <sub>2</sub> B, Mn, In                                                             |
| <b>Fe</b> |          | <b>6</b>                    | Fe <sub>2</sub> B, FeSi                                                               | Fe        |             | 192                        | Fe <sub>2</sub> B, Fe, In                                                             |
| Co        | 29       | CoB, Co <sub>2</sub> Si, Co | Co                                                                                    | 156       | Co, CoB, In |                            |                                                                                       |
| Sc        |          | 122                         | Sc, ScB <sub>2</sub> , Sc <sub>3</sub> P <sub>2</sub>                                 | Sc        |             | 115                        | Sc, ScB <sub>2</sub> , Sc <sub>5</sub> Sn <sub>3</sub>                                |
| Y         |          | 214                         | Y, YB <sub>2</sub> , YP                                                               | Y         |             | 189                        | Y, YB <sub>2</sub> , Y <sub>5</sub> Sn <sub>3</sub>                                   |
| Ti        |          | 53                          | TiB, Ti <sub>3</sub> P                                                                | Ti        |             | 130                        | TiB, Ti <sub>3</sub> Sn                                                               |
| Zr        |          | 133                         | Zr, ZrB <sub>2</sub> , Zr <sub>3</sub> P                                              | Zr        |             | 128                        | Zr, ZrB <sub>2</sub> , Zr <sub>5</sub> Sn <sub>3</sub>                                |
| Hf        |          | 167                         | Hf, HfB <sub>2</sub> , Hf <sub>3</sub> P                                              | Hf        |             | 129                        | Hf, HfB <sub>2</sub> , Hf <sub>3</sub> Sn <sub>3</sub>                                |
| V         |          | -92                         | VB, V <sub>3</sub> P                                                                  | V         |             | 106                        | V <sub>3</sub> B <sub>2</sub> , V <sub>3</sub> Sn, VSn <sub>2</sub>                   |
| Nb        | P        | -52                         | NbB, Nb <sub>3</sub> P                                                                | Nb        | Sn          | 58                         | NbB, Nb <sub>3</sub> Sn                                                               |
| Ta        |          | -40                         | TaB, Ta <sub>3</sub> P                                                                | Ta        |             | 66                         | Ta <sub>3</sub> B <sub>2</sub> , Ta <sub>3</sub> Sn, Sn                               |
| <b>Cr</b> |          | <b>-42</b>                  | CrB, Cr <sub>3</sub> P                                                                | Cr        |             | 258                        | Cr <sub>2</sub> B, Cr, Sn                                                             |
| <b>Mo</b> |          | <b>10</b>                   | MoB, Mo <sub>3</sub> P                                                                | Mo        |             | 156                        | Mo, MoB, Sn                                                                           |
| W         |          | 72                          | W <sub>2</sub> B, WP                                                                  | W         |             | 305                        | W <sub>2</sub> B, W, Sn                                                               |
| <b>Mn</b> |          | <b>-10</b>                  | Mn <sub>2</sub> B, MnB, Mn <sub>2</sub> P                                             | Mn        |             | 195                        | Mn <sub>2</sub> B, Mn, Sn                                                             |
| <b>Fe</b> |          | <b>-3</b>                   | Fe <sub>2</sub> B, FeP                                                                | Fe        |             | 143                        | Fe <sub>2</sub> B, FeSn                                                               |
| <b>Co</b> |          | <b>40</b>                   | CoB, Co <sub>2</sub> P, Co                                                            | Co        |             | 125                        | CoB, Co, CoSn                                                                         |
| Sc        |          | 87                          | Sc, ScB <sub>2</sub> , Sc <sub>5</sub> Ga <sub>3</sub>                                |           |             |                            |                                                                                       |
| Y         |          | 136                         | Y, YB <sub>2</sub> , Y <sub>5</sub> Ga <sub>3</sub>                                   |           |             |                            |                                                                                       |
| Ti        |          | 99                          | TiB, Ti <sub>3</sub> Ga                                                               |           |             |                            |                                                                                       |
| Zr        |          | 128                         | Zr, Zr <sub>2</sub> Ga, ZrB <sub>2</sub>                                              |           |             |                            |                                                                                       |
| Hf        |          | 157                         | Hf, Hf <sub>2</sub> Ga, HfB <sub>2</sub>                                              |           |             |                            |                                                                                       |
| V         |          | 31                          | V <sub>3</sub> B <sub>2</sub> , V <sub>3</sub> Ga, V <sub>6</sub> Ga <sub>5</sub>     |           |             |                            |                                                                                       |
| Nb        | Ga       | 15                          | Nb <sub>3</sub> B <sub>2</sub> , Nb <sub>5</sub> Ga <sub>3</sub> , Nb                 |           |             |                            |                                                                                       |
| Ta        |          | 9                           | Ta, Ta <sub>3</sub> B <sub>2</sub> , Ta <sub>5</sub> Ga <sub>3</sub> B                |           |             |                            |                                                                                       |
| Cr        |          | 96                          | Cr <sub>2</sub> B, Cr, CrGa <sub>4</sub>                                              |           |             |                            |                                                                                       |
| Mo        |          | 48                          | MoB, Mo <sub>3</sub> Ga                                                               |           |             |                            |                                                                                       |
| W         |          | 45                          | W <sub>2</sub> B, W, Ga                                                               |           |             |                            |                                                                                       |
| Mn        |          | 86                          | Mn <sub>2</sub> B, Mn <sub>3</sub> Ga, MnGa <sub>4</sub>                              |           |             |                            |                                                                                       |
| Fe        |          | 63                          | Fe <sub>2</sub> B, FeGa <sub>3</sub> , Fe <sub>3</sub> Ga                             |           |             |                            |                                                                                       |
| Co        |          | 67                          | Co, CoB, CoGa                                                                         |           |             |                            |                                                                                       |

Table S2. Experimentally reported ternary T2 phases.

| <i>Phase</i>         | <i>References</i> |
|----------------------|-------------------|
| $V_5SiB_2^\dagger$   | 1                 |
| $Nb_5SiB_2$          | 2, 3              |
| $Ta_5SiB_2$          | 4-6               |
| $Mo_5SiB_2$          | 7, 8              |
| $W_5SiB_2$           | 7, 9              |
| $Mn_5SiB_2$          | 10                |
| $Fe_5SiB_2$          | 11-15             |
| $Co_5SiB_2^\ddagger$ | 15                |
| $Ta_5GeB_2$          | 16                |
| $Cr_5PB_2$           | 17                |
| $Mo_5PB_2$           | 18, 19            |
| $Mn_5PB_2$           | 20                |
| $Fe_5PB_2$           | 12, 14, 20, 21    |
| $Co_5PB_2$           | 20                |

<sup>†</sup> Reported with 50 at% B at Si-site.

<sup>‡</sup> Si partially occupy B-site with a  $Co_5Si_2B$  composition.

Table S3. Experimentally reported quaternary solid solution T2 phases with *M*-site chemical disorder.

| <i>Phase</i>                 | <i>References</i> |
|------------------------------|-------------------|
| $(Fe_{0.8}Mn_{0.2})_5SiB_2$  | 12                |
| $(Fe_{0.8}Co_{0.2})_5SiB_2$  | 12, 15            |
| $(Fe_{0.8}Mn_{0.2})_5PB_2$   | 12                |
| $(Fe_{0.8}Co_{0.2})_5PB_2$   | 12, 21            |
| $(Co_{0.7}Fe_{0.3})_5PB_2$   | 21                |
| $(W_{0.96}Ta_{0.04})_5SiB_2$ | 22                |

Table S4. Experimentally reported quaternary T2 phases with *M*-site chemical order (*o*-MAB)

| <i>Year</i> | <i>Phase</i>  | <i>References</i> |
|-------------|---------------|-------------------|
| 2020        | $Ti_4MoSiB_2$ | 23                |

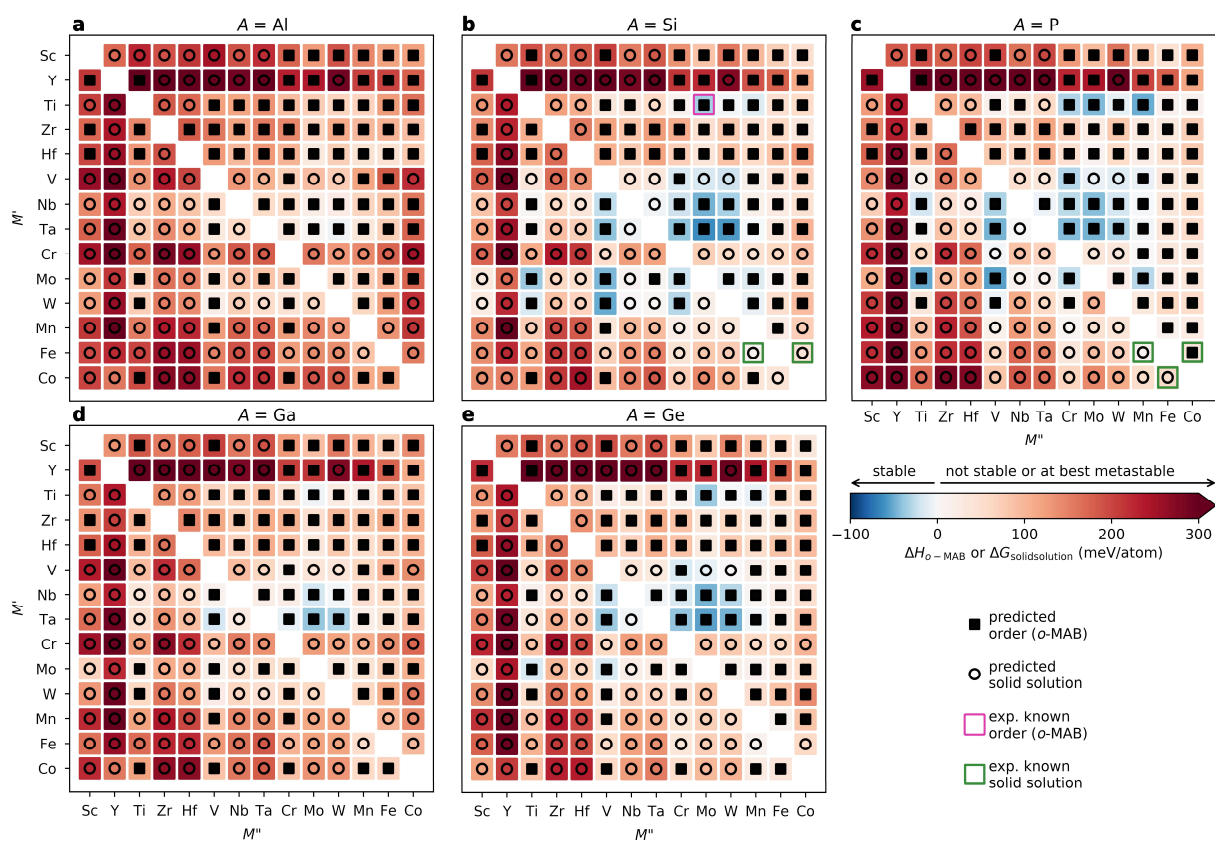

Figure S5. Calculated formation enthalpy  $\Delta H$  at 0 K for  $A = \text{Al}$ ,  $\text{Si}$ ,  $\text{P}$ ,  $\text{Ga}$ , and  $\text{Ge}$ . Symbols represent chemical order of lowest energy at given  $M'$  and  $M''$  with full square for ordered  $M'_4M''AB_2$   $o$ -MAB and open circle for solid solution  $(M'_{0.8}M''_{0.2})_5AB_2$ .



Table S5. List of stable  $o$ -MAB phases,  $M'_4M''AB_2$ , with their calculated formation enthalpy and identified equilibrium simplex. For comparison, the Gibbs free energy of formation is given for a disordered distribution of  $M'$  and  $M''$ , estimated at a typical synthesis temperature of 2000 K. These  $o$ -MAB phases fulfill the stability criteria  $\Delta H_{o\text{-MAB}} < 0$  and  $\Delta H_{o\text{-MAB}} - \Delta G_{\text{solid solution}} < 0$ .

| $A$ | $M'$ | $M''$ | $\Delta H_{o\text{-MAB}}$<br>(meV/atom) | $\Delta G_{\text{solid solution}}$<br>(meV/atom) | Equilibrium simplex                                                                                                    | Exp. reference |
|-----|------|-------|-----------------------------------------|--------------------------------------------------|------------------------------------------------------------------------------------------------------------------------|----------------|
| Si  | Ti   | Mo    | -33                                     | -31                                              | TiB, Mo, Ti <sub>5</sub> Si <sub>3</sub> , Ti <sub>6</sub> Si <sub>2</sub> B                                           | 23             |
| Si  | Ti   | Mn    | -13                                     | 49                                               | TiB, TiMn <sub>2</sub> , Ti <sub>5</sub> Si <sub>3</sub> , Ti <sub>3</sub> B <sub>4</sub>                              |                |
| Si  | Nb   | V     | -25                                     | -20                                              | Nb <sub>5</sub> SiB <sub>2</sub> , V <sub>5</sub> SiB <sub>2</sub>                                                     |                |
| Si  | Nb   | Cr    | -21                                     | 15                                               | NbB, Cr, Nb <sub>5</sub> Si <sub>3</sub> , Nb <sub>3</sub> B <sub>2</sub>                                              |                |
| Si  | Ta   | V     | -40                                     | -29                                              | Ta <sub>5</sub> SiB <sub>2</sub> , V <sub>5</sub> SiB <sub>2</sub>                                                     |                |
| Si  | Ta   | Cr    | -40                                     | 8                                                | TaB, Ta <sub>5</sub> SiB <sub>2</sub> , Cr <sub>3</sub> Si                                                             |                |
| Si  | Ta   | Mn    | -1                                      | 45                                               | TaB, TaMnSi, Ta <sub>5</sub> SiB <sub>2</sub> , TaMn <sub>2</sub>                                                      |                |
| Si  | Mo   | V     | -46                                     | -41                                              | VB, Mo <sub>5</sub> SiB <sub>2</sub> , Mo <sub>3</sub> Si                                                              |                |
| Si  | Mo   | Cr    | -22                                     | -11                                              | Mo <sub>2</sub> CrB <sub>2</sub> , Mo <sub>5</sub> Si <sub>3</sub> , Mo <sub>3</sub> Si                                |                |
| Si  | Mo   | Mn    | -13                                     | -6                                               | Mo <sub>2</sub> MnB <sub>2</sub> , Mo <sub>5</sub> Si <sub>3</sub> , Mo <sub>3</sub> Si                                |                |
| Si  | W    | Cr    | -28                                     | -25                                              | W <sub>5</sub> SiB <sub>2</sub> , CrB, Cr <sub>3</sub> Si                                                              |                |
| P   | Ti   | Cr    | -30                                     | 11                                               | TiB <sub>2</sub> , Ti <sub>2</sub> P, Ti <sub>3</sub> P, TiCr <sub>2</sub>                                             |                |
| P   | Ti   | Mo    | -44                                     | -41                                              | TiB <sub>2</sub> , Ti <sub>3</sub> P, Mo                                                                               |                |
| P   | Ti   | Mn    | -49                                     | 31                                               | TiB <sub>2</sub> , Ti <sub>3</sub> P, Ti <sub>2</sub> P, TiMn <sub>2</sub>                                             |                |
| P   | Nb   | V     | -32                                     | -14                                              | Nb <sub>5</sub> PB <sub>2</sub> , V <sub>5</sub> PB <sub>2</sub>                                                       |                |
| P   | Nb   | Cr    | -27                                     | 19                                               | Nb <sub>5</sub> PB <sub>2</sub> , NbCrP, Cr <sub>2</sub> B, NbB                                                        |                |
| P   | Nb   | Mn    | -2                                      | 52                                               | NbB, NbMnP, Nb <sub>5</sub> PB <sub>2</sub> , NbMn <sub>2</sub>                                                        |                |
| P   | Ta   | V     | -46                                     | -24                                              | Ta <sub>5</sub> PB <sub>2</sub> , V <sub>5</sub> PB <sub>2</sub>                                                       |                |
| P   | Ta   | Cr    | -43                                     | 15                                               | TaB, TaCrP, Ta <sub>5</sub> PB <sub>2</sub> , Cr                                                                       |                |
| P   | Ta   | W     | -32                                     | -27                                              | TaB, Ta <sub>2</sub> P, W                                                                                              |                |
| P   | Ta   | Mn    | -3                                      | 61                                               | TaB, TaMnP, Ta <sub>5</sub> PB <sub>2</sub> , TaMn <sub>2</sub>                                                        |                |
| P   | Mo   | V     | -55                                     | -52                                              | MoB, Mo <sub>3</sub> P, VB                                                                                             |                |
| P   | Mo   | Cr    | -25                                     | -11                                              | Mo <sub>2</sub> CrB <sub>2</sub> , Mo <sub>3</sub> P, MoP                                                              |                |
| P   | Mo   | Mn    | -28                                     | -1                                               | Mo <sub>2</sub> MnB <sub>2</sub> , MoP, Mo <sub>3</sub> P                                                              |                |
| Ga  | Ti   | Mo    | -4                                      | 14                                               | TiB, Ti <sub>2</sub> Ga, Mo                                                                                            |                |
| Ga  | Ta   | V     | -17                                     | -12                                              | TaB, Ta <sub>5</sub> Ga <sub>3</sub> , V <sub>3</sub> B <sub>2</sub> , Ta                                              |                |
| Ga  | Ta   | Cr    | -8                                      | 39                                               | TaB, TaCr <sub>2</sub> , Ta <sub>5</sub> Ga <sub>3</sub> , CrGa <sub>4</sub>                                           |                |
| Ga  | Ta   | W     | -31                                     | -28                                              | TaB, W, Ta <sub>3</sub> B <sub>2</sub> , Ta <sub>5</sub> Ga <sub>3</sub>                                               |                |
| Ge  | Ti   | Mo    | -37                                     | -19                                              | TiB, Mo, Ti, Ti <sub>5</sub> Ge <sub>3</sub>                                                                           |                |
| Ge  | Ti   | W     | -1                                      | 10                                               | TiB, W, Ti, Ti <sub>5</sub> Ge <sub>3</sub>                                                                            |                |
| Ge  | Ti   | Mn    | -8                                      | 67                                               | TiB, TiMn <sub>2</sub> , Ti <sub>5</sub> Ge <sub>3</sub> , Ti <sub>3</sub> B <sub>4</sub>                              |                |
| Ge  | Nb   | V     | -22                                     | -21                                              | Nb <sub>5</sub> GeB <sub>2</sub> , V <sub>5</sub> B <sub>6</sub> , Nb <sub>5</sub> Ge <sub>3</sub> , V <sub>3</sub> Ge |                |
| Ge  | Nb   | Cr    | -16                                     | 14                                               | NbB, Cr, Nb <sub>5</sub> Ge <sub>3</sub> , Nb <sub>5</sub> GeB <sub>2</sub>                                            |                |
| Ge  | Ta   | V     | -36                                     | -30                                              | Ta <sub>5</sub> GeB <sub>2</sub> , V <sub>5</sub> GeB <sub>2</sub>                                                     |                |
| Ge  | Ta   | Cr    | -39                                     | 3                                                | TaB, Ta <sub>5</sub> GeB <sub>2</sub> , Mo <sub>3</sub> Ge                                                             |                |
| Ge  | Ta   | Mn    | -3                                      | 35                                               | TaB, TaMnGe, Ta <sub>5</sub> GeB <sub>2</sub> , TaMn <sub>2</sub>                                                      |                |

Table S6. List of stable solid solution phases,  $(M'_{0.8}M''_{0.2})_5AB_2$ , with Gibbs free energy of formation estimated at a typical synthesis temperature of 2000 K (given for a disordered distribution of  $M'$  and  $M''$ ) and identified equilibrium simplex. For comparison, the calculated formation enthalpy for the  $o$ -MAB phase is provided. These solid solution phases,  $(M'_{0.8}M''_{0.2})_5AB_2$ , fulfill the stability criteria  $\Delta G_{\text{solid solution}} < 0$  and  $\Delta H_{o\text{-MAB}} - \Delta G_{\text{solid solution}} > 0$ .

| $A$ | $M'$ | $M''$ | $\Delta H_{o\text{-MAB}}$<br>(meV/atom) | $\Delta G_{\text{solid solution}}$<br>(meV/atom) | Equilibrium simplex                                                                                                                    | Exp. reference |
|-----|------|-------|-----------------------------------------|--------------------------------------------------|----------------------------------------------------------------------------------------------------------------------------------------|----------------|
| Al  | Ta   | Mo    | 6                                       | -4                                               | Ta <sub>2</sub> Al, TaB, Ta <sub>3</sub> B <sub>2</sub> , Mo <sub>3</sub> Al                                                           |                |
| Al  | Ta   | W     | -4                                      | -6                                               | TaB, Ta <sub>2</sub> Al, W                                                                                                             |                |
| Si  | Ti   | Nb    | 42                                      | -3                                               | TiB, Ti <sub>6</sub> Si <sub>2</sub> B, Nb, Nb <sub>5</sub> SiB <sub>2</sub>                                                           |                |
| Si  | Ti   | W     | -2                                      | -8                                               | TiB, W, Ti <sub>5</sub> Si <sub>3</sub> , Ti <sub>6</sub> Si <sub>2</sub> B                                                            |                |
| Si  | V    | Ti    | 81                                      | -16                                              | V <sub>3</sub> B <sub>2</sub> , V <sub>5</sub> SiB <sub>2</sub> , Ti <sub>5</sub> Si <sub>3</sub> , Ti                                 |                |
| Si  | V    | Nb    | 105                                     | -13                                              | V <sub>5</sub> SiB <sub>2</sub> , Nb <sub>5</sub> SiB <sub>2</sub>                                                                     |                |
| Si  | V    | Ta    | 88                                      | -23                                              | V <sub>5</sub> SiB <sub>2</sub> , Ta <sub>5</sub> SiB <sub>2</sub>                                                                     |                |
| Si  | V    | Cr    | -16                                     | -49                                              | VB, V <sub>5</sub> SiB <sub>2</sub> , Cr <sub>3</sub> Si                                                                               |                |
| Si  | V    | Mo    | 19                                      | -70                                              | VB, V <sub>5</sub> SiB <sub>2</sub> , Mo <sub>3</sub> Si                                                                               |                |
| Si  | V    | W     | 8                                       | -75                                              | VB, W, V <sub>5</sub> SiB <sub>2</sub> , V <sub>5</sub> Si <sub>3</sub>                                                                |                |
| Si  | V    | Mn    | 20                                      | -10                                              | VB, VMn <sub>2</sub> Si, V <sub>5</sub> SiB <sub>2</sub>                                                                               |                |
| Si  | Nb   | Ti    | 3                                       | -43                                              | Nb <sub>5</sub> SiB <sub>2</sub> , TiB, Ti <sub>6</sub> Si <sub>2</sub> B, Nb                                                          |                |
| Si  | Nb   | Hf    | 94                                      | -12                                              | Nb <sub>5</sub> SiB <sub>2</sub> , Nb <sub>3</sub> B <sub>2</sub> , Hf <sub>2</sub> Si                                                 |                |
| Si  | Nb   | Ta    | -3                                      | -57                                              | Nb <sub>5</sub> SiB <sub>2</sub> , Ta <sub>5</sub> SiB <sub>2</sub>                                                                    |                |
| Si  | Nb   | Mo    | -47                                     | -67                                              | NbB, Mo, Nb <sub>5</sub> SiB <sub>2</sub> , Nb <sub>5</sub> Si <sub>3</sub>                                                            |                |
| Si  | Nb   | W     | -32                                     | -47                                              | NbB, W, Nb <sub>5</sub> SiB <sub>2</sub> , Nb <sub>5</sub> Si <sub>3</sub>                                                             |                |
| Si  | Ta   | Ti    | 15                                      | -34                                              | Ta <sub>5</sub> SiB <sub>2</sub> , Ta <sub>3</sub> B <sub>2</sub> , Ti <sub>6</sub> Si <sub>2</sub> B, Ti <sub>5</sub> Si <sub>3</sub> |                |
| Si  | Ta   | Nb    | 5                                       | -58                                              | Ta <sub>5</sub> SiB <sub>2</sub> , Nb <sub>5</sub> SiB <sub>2</sub>                                                                    |                |
| Si  | Ta   | Mo    | -63                                     | -77                                              | TaB, Ta <sub>5</sub> SiB <sub>2</sub> , Mo <sub>3</sub> Si                                                                             |                |
| Si  | Ta   | W     | -58                                     | -66                                              | TaB, W, Ta <sub>5</sub> Si <sub>3</sub> , Ta <sub>5</sub> SiB <sub>2</sub>                                                             |                |
| S   | Cr   | Mn    | 49                                      | -8                                               | CrB, Cr <sub>3</sub> Si, Mn <sub>2</sub> B, MnSi                                                                                       |                |
| Si  | Mo   | Sc    | 42                                      | -24                                              | Mo, MoB, ScB <sub>2</sub> , Sc <sub>2</sub> Mo <sub>3</sub> Si <sub>4</sub>                                                            |                |
| Si  | Mo   | Ti    | -37                                     | -49                                              | Mo <sub>3</sub> Si, TiB <sub>2</sub> , Mo                                                                                              |                |
| Si  | Mo   | Hf    | 73                                      | -2                                               | Mo <sub>3</sub> Si, HfB <sub>2</sub> , Mo                                                                                              |                |
| Si  | Mo   | Nb    | 21                                      | -46                                              | NbB, Mo <sub>5</sub> SiB <sub>2</sub> , Mo <sub>3</sub> Si                                                                             |                |
| Si  | Mo   | Ta    | 7                                       | -43                                              | TaB, Mo <sub>5</sub> SiB <sub>2</sub> , Mo <sub>3</sub> Si                                                                             |                |
| Si  | Mo   | W     | -7                                      | -39                                              | MoB, W, Mo <sub>5</sub> SiB <sub>2</sub> , Mo <sub>5</sub> Si <sub>3</sub>                                                             |                |
| Si  | W    | Sc    | 68                                      | -27                                              | W <sub>2</sub> B, W <sub>5</sub> SiB <sub>2</sub> , Sc <sub>5</sub> Si <sub>3</sub> , ScB <sub>2</sub>                                 |                |
| Si  | W    | Ti    | -14                                     | -45                                              | W, TiB <sub>2</sub> , WSi <sub>2</sub>                                                                                                 |                |
| Si  | W    | V     | -50                                     | -58                                              | W, VB, W <sub>5</sub> SiB <sub>2</sub> , WSi <sub>2</sub>                                                                              |                |
| Si  | W    | Nb    | 42                                      | -53                                              | W <sub>5</sub> SiB <sub>2</sub> , W <sub>2</sub> B, NbB, Nb <sub>5</sub> Si <sub>3</sub>                                               |                |
| Si  | W    | Ta    | 25                                      | -48                                              | W, TaB, W <sub>5</sub> SiB <sub>2</sub> , WSi <sub>2</sub>                                                                             |                |
| Si  | W    | Mo    | 27                                      | -33                                              | W <sub>2</sub> B, MoSi <sub>2</sub> , Mo <sub>5</sub> SiB <sub>3</sub>                                                                 |                |
| Si  | W    | Mn    | -7                                      | -11                                              | W <sub>2</sub> B, MnSi                                                                                                                 |                |
| Si  | Mn   | V     | 36                                      | -15                                              | Mn <sub>2</sub> B, MnSi, VB, VMn <sub>2</sub> Si                                                                                       |                |
| Si  | Mn   | Cr    | 27                                      | -33                                              | Mn <sub>2</sub> B, MnSi, CrB, Cr <sub>3</sub> Si                                                                                       |                |
| Si  | Mn   | Mo    | 118                                     | -8                                               | Mn <sub>2</sub> B, MnSi, Mo <sub>2</sub> MnB <sub>2</sub> , MnSi                                                                       |                |
| Si  | Mn   | W     | 95                                      | -17                                              | Mn <sub>2</sub> B, MnSi, W <sub>2</sub> B                                                                                              |                |
| Si  | Mn   | Fe    | 24                                      | -25                                              | Mn <sub>2</sub> B, FeSi                                                                                                                |                |
| Si  | Fe   | Cr    | 62                                      | -11                                              | Fe <sub>2</sub> B, Fe <sub>2</sub> Si, CrB                                                                                             |                |
| Si  | Fe   | Mn    | 16                                      | -44                                              | MnB, Fe <sub>2</sub> B, Fe <sub>2</sub> Si                                                                                             | 12             |
| Si  | Fe   | Co    | 51                                      | -13                                              | Fe <sub>2</sub> B, CoSi                                                                                                                | 12, 15         |
| Si  | Co   | Mn    | 41                                      | -5                                               | MnB, Fe <sub>2</sub> B, Fe <sub>2</sub> Si                                                                                             |                |
| Si  | Co   | Fe    | 48                                      | -12                                              | Fe <sub>2</sub> B, CoSi                                                                                                                |                |
| P   | Ti   | Nb    | 35                                      | -14                                              | Ti <sub>3</sub> P, Nb <sub>3</sub> B <sub>2</sub> , Ti <sub>3</sub> B <sub>4</sub> , TiB                                               |                |
| P   | Ti   | W     | -9                                      | -11                                              | TiB <sub>2</sub> , Ti <sub>3</sub> P, W                                                                                                |                |
| P   | V    | Ti    | 60                                      | -33                                              | V <sub>3</sub> B <sub>2</sub> , TiVP, V <sub>5</sub> PB <sub>2</sub> , VB                                                              |                |
| P   | V    | Nb    | 117                                     | -7                                               | V <sub>5</sub> PB <sub>2</sub> , Nb <sub>5</sub> PB <sub>2</sub>                                                                       |                |
| P   | V    | Ta    | 97                                      | -19                                              | V <sub>5</sub> PB <sub>2</sub> , Ta <sub>5</sub> PB <sub>2</sub>                                                                       |                |
| P   | V    | Cr    | -30                                     | -57                                              | V <sub>5</sub> PB <sub>2</sub> , Cr <sub>5</sub> PB <sub>2</sub>                                                                       |                |
| P   | V    | Mo    | 26                                      | -61                                              | V <sub>5</sub> PB <sub>2</sub> , VB, Mo <sub>3</sub> P                                                                                 |                |
| P   | V    | W     | 15                                      | -66                                              | VB, W, V <sub>5</sub> PB <sub>2</sub> , V <sub>12</sub> P <sub>7</sub>                                                                 |                |

|    |    |    |     |     |                                                                                                                       |    |
|----|----|----|-----|-----|-----------------------------------------------------------------------------------------------------------------------|----|
| P  | V  | Mn | -6  | -31 | V <sub>5</sub> PB <sub>2</sub> , VMnP, Mn <sub>2</sub> B, VB                                                          |    |
| P  | Nb | Ti | -19 | -54 | NbB, Nb <sub>5</sub> PB <sub>2</sub> , Ti <sub>3</sub> P                                                              |    |
| P  | Nb | Zr | 107 | -6  | Nb <sub>5</sub> PB <sub>2</sub> , Nb <sub>3</sub> B <sub>2</sub> , Zr <sub>3</sub> P, Zr <sub>7</sub> P <sub>4</sub>  |    |
| P  | Nb | Hf | 74  | -29 | Nb <sub>5</sub> PB <sub>2</sub> , NbB, Hf <sub>3</sub> P                                                              |    |
| P  | Nb | Ta | -6  | -55 | Nb <sub>5</sub> PB <sub>2</sub> , Ta <sub>5</sub> PB <sub>2</sub>                                                     |    |
| P  | Nb | Mo | -42 | -51 | NbB, Mo, Nb <sub>7</sub> P <sub>4</sub> , Nb <sub>5</sub> PB <sub>2</sub>                                             |    |
| P  | Nb | W  | -18 | -19 | NbB, W, Nb <sub>7</sub> P <sub>4</sub> , Nb <sub>5</sub> PB <sub>2</sub>                                              |    |
| P  | Ta | Ti | 3   | -36 | Ta <sub>3</sub> B <sub>2</sub> , Ta <sub>5</sub> PB <sub>2</sub> , Ti <sub>2</sub> P                                  |    |
| P  | Ta | Nb | 7   | -55 | Ta <sub>5</sub> PB <sub>2</sub> , Nb <sub>5</sub> PB <sub>2</sub>                                                     |    |
| P  | Ta | Mo | -47 | -51 | TaB, Ta <sub>5</sub> PB <sub>2</sub> , Mo <sub>3</sub> P                                                              |    |
| P  | Cr | V  | 10  | -56 | Cr <sub>5</sub> PB <sub>2</sub> , V <sub>5</sub> PB <sub>2</sub>                                                      |    |
| P  | Cr | Mo | 104 | -18 | Cr <sub>5</sub> PB <sub>2</sub> , Mo <sub>2</sub> CrB <sub>2</sub> , MoP, Mo <sub>3</sub> P                           |    |
| P  | Cr | W  | 88  | -21 | Cr <sub>5</sub> PB <sub>2</sub> , W <sub>2</sub> B, CrP                                                               |    |
| P  | Cr | Mn | 1   | -45 | Cr <sub>5</sub> PB <sub>2</sub> , Mn <sub>5</sub> PB <sub>2</sub>                                                     |    |
| P  | Cr | Fe | 32  | -10 | CrFeP, CrB, Cr <sub>3</sub> B <sub>3</sub>                                                                            |    |
| P  | Cr | Co | 33  | -10 | Co <sub>2</sub> P, Cr <sub>5</sub> PB <sub>2</sub> , CrB, Cr <sub>5</sub> B <sub>3</sub>                              |    |
| P  | Mo | Ti | -51 | -69 | Mo <sub>3</sub> P, TiB <sub>2</sub> , Mo                                                                              |    |
| P  | Mo | Nb | 34  | -42 | MoB, Mo, NbP                                                                                                          |    |
| P  | Mo | Ta | 21  | -39 | TaB, Mo <sub>3</sub> P, MoB                                                                                           |    |
| P  | Mo | W  | 25  | -14 | MoB, W, MoP, Mo <sub>3</sub> P                                                                                        |    |
| P  | W  | Ti | 37  | -5  | W <sub>2</sub> B, TiP                                                                                                 |    |
| P  | W  | V  | -6  | -19 | W <sub>2</sub> B, VP                                                                                                  |    |
| P  | Mn | V  | 37  | -35 | Mn <sub>25</sub> PB <sub>2</sub> , Mn <sub>2</sub> B, VMnP, VB                                                        |    |
| P  | Mn | Cr | 21  | -48 | Mn <sub>5</sub> PB <sub>2</sub> , Cr <sub>5</sub> PB <sub>2</sub>                                                     |    |
| P  | Mn | Mo | 128 | -9  | Mn <sub>5</sub> PB <sub>2</sub> , Mn <sub>2</sub> P, Mo <sub>2</sub> MnB <sub>2</sub>                                 |    |
| P  | Mn | W  | 115 | -14 | Mn <sub>5</sub> PB <sub>2</sub> , W <sub>2</sub> B, MnP                                                               |    |
| P  | Mn | Fe | 13  | -27 | MnFeP, Mn <sub>2</sub> B, MnB                                                                                         |    |
| P  | Mn | Co | 28  | -19 | Mn <sub>5</sub> PB <sub>2</sub> , Mn <sub>2</sub> B, MnB, Co <sub>2</sub> P                                           |    |
| P  | Fe | Cr | 63  | -22 | Fe <sub>5</sub> PB <sub>2</sub> , Fe <sub>2</sub> B, CrFeP, CrB                                                       |    |
| P  | Fe | Mn | 18  | -42 | MnFeP, Fe <sub>2</sub> B, FeB                                                                                         | 12 |
| P  | Fe | Co | 36  | -12 | CoFeP, Fe <sub>2</sub> B, FeB                                                                                         | 21 |
| P  | Co | Mn | 66  | -2  | CoB, Co <sub>2</sub> P, Mn <sub>2</sub> B, Co                                                                         |    |
| P  | Co | Fe | 73  | -2  | CoB, Co <sub>2</sub> P, CoFe, CoFeP                                                                                   | 21 |
| Ga | V  | Cr | 21  | -5  | V <sub>3</sub> B <sub>2</sub> , Cr, V <sub>6</sub> Ga <sub>5</sub> , V <sub>2</sub> Ga <sub>5</sub>                   |    |
| Ga | V  | Mo | 59  | -13 | V <sub>3</sub> B <sub>2</sub> , Mo <sub>3</sub> Ga, V <sub>3</sub> Ga, V <sub>6</sub> Ga <sub>5</sub>                 |    |
| Ga | V  | W  | 52  | -14 | V <sub>3</sub> B <sub>2</sub> , W, V <sub>6</sub> Ga <sub>5</sub> , V <sub>2</sub> Ga <sub>5</sub>                    |    |
| Ga | Nb | Ti | 45  | -16 | Nb <sub>3</sub> B <sub>2</sub> , Ti <sub>2</sub> Ga, Nb <sub>5</sub> Ga <sub>3</sub> , Ta                             |    |
| Ga | Nb | Ta | 22  | -30 | Nb <sub>3</sub> B <sub>2</sub> , Nb <sub>5</sub> Ga <sub>3</sub> , Ta <sub>3</sub> B <sub>2</sub> , Nb                |    |
| Ga | Nb | Mo | -18 | -27 | NbB, Mo, Nb <sub>3</sub> B <sub>2</sub> , Nb <sub>5</sub> Ga <sub>3</sub>                                             |    |
| Ga | Nb | W  | -2  | -6  | NbB, W, Nb <sub>3</sub> B <sub>2</sub> , Nb <sub>5</sub> Ga <sub>3</sub>                                              |    |
| Ga | Ta | Ti | 64  | 0   | Ta <sub>3</sub> B <sub>2</sub> , Ti <sub>2</sub> Ga, Ta <sub>5</sub> Ga <sub>3</sub> , Ta                             |    |
| Ga | Ta | Nb | 31  | -27 | Ta <sub>3</sub> B <sub>2</sub> , Ta, Nb <sub>5</sub> Ga <sub>3</sub> , Ta <sub>5</sub> Ga <sub>3</sub>                |    |
| Ga | Ta | Mo | -39 | -42 | Ta <sub>3</sub> B <sub>2</sub> , Mo <sub>3</sub> Ga, TaB, Ta <sub>5</sub> Ga <sub>3</sub>                             |    |
| Ga | Mo | Nb | 67  | -1  | MoB, Mo <sub>3</sub> Ga, NbB                                                                                          |    |
| Ga | Mo | W  | 34  | -2  | MoB, W, Mo <sub>3</sub> Ga, MoGa <sub>4</sub>                                                                         |    |
| Ga | W  | Ta | 70  | -4  | W, W <sub>2</sub> B, TaB, Ga                                                                                          |    |
| Ge | Ti | Nb | 30  | -7  | TiB, Nb, Ti <sub>5</sub> Ge <sub>3</sub> , Ti                                                                         |    |
| Ge | V  | Nb | 100 | -13 | V <sub>5</sub> Ge <sub>3</sub> , Nb <sub>5</sub> Ge <sub>3</sub> , V <sub>3</sub> Ge, V <sub>5</sub> GeB <sub>2</sub> |    |
| Ge | V  | Ta | 82  | -25 | V <sub>5</sub> GeB <sub>2</sub> , Ta <sub>5</sub> GeB <sub>2</sub>                                                    |    |
| Ge | V  | Cr | -15 | -49 | VB, V <sub>4</sub> GeB <sub>2</sub> , Cr <sub>3</sub> Ge                                                              |    |
| Ge | V  | Mo | 23  | -62 | VB, V <sub>4</sub> GeB <sub>2</sub> , Mo <sub>3</sub> Ge                                                              |    |
| Ge | V  | W  | 24  | -52 | VB, W, V <sub>5</sub> Ge <sub>3</sub> , V <sub>5</sub> SiB <sub>2</sub>                                               |    |
| Ge | V  | Mn | 19  | -17 | VB, VMn, VMn <sub>2</sub> Ge, V <sub>5</sub> Ge <sub>3</sub>                                                          |    |
| Ge | V  | Fe | 28  | -7  | VB, Fe, V <sub>5</sub> Ge <sub>3</sub> , V <sub>5</sub> SiB <sub>2</sub>                                              |    |
| Ge | Nb | Ti | 16  | -37 | Nb <sub>3</sub> B <sub>2</sub> , Nb <sub>5</sub> GeB <sub>2</sub> , Ti <sub>5</sub> Ge <sub>3</sub> , Nb              |    |
| Ge | Nb | Hf | 103 | -8  | Hf <sub>2</sub> Ge, Nb <sub>3</sub> B <sub>2</sub> , Nb <sub>5</sub> GeB <sub>2</sub>                                 |    |
| Ge | Nb | Ta | -4  | -57 | Nb <sub>5</sub> GeB <sub>2</sub> , Ta <sub>5</sub> GeB <sub>2</sub>                                                   |    |
| Ge | Nb | Mo | -46 | -64 | NbB, Mo, Nb <sub>5</sub> Ge <sub>3</sub> , Nb <sub>5</sub> GeB <sub>2</sub>                                           |    |
| Ge | Nb | W  | -28 | -38 | NbB, W, Nb <sub>5</sub> Ge <sub>3</sub> , Nb <sub>5</sub> GeB <sub>2</sub>                                            |    |
| Ge | Ta | Ti | 46  | -12 | Ta <sub>3</sub> B <sub>2</sub> , Ta <sub>5</sub> GeB <sub>2</sub> , Ti <sub>5</sub> Ge <sub>3</sub> , Ta              |    |

|    |    |    |     |     |                                                                              |
|----|----|----|-----|-----|------------------------------------------------------------------------------|
| Ge | Ta | Nb | 6   | -57 | Ta <sub>5</sub> GeB <sub>2</sub> , Nb <sub>5</sub> GeB <sub>2</sub>          |
| Ge | Ta | Mo | -55 | -69 | TaB, Ta <sub>5</sub> GeB <sub>2</sub> , Mo <sub>3</sub> Ge                   |
| Ge | Ta | W  | -48 | -53 | TaB, W, Ta <sub>5</sub> Ge <sub>3</sub> , Ta <sub>5</sub> GeB <sub>2</sub>   |
| Ge | Mo | Ti | -14 | -35 | Mo <sub>3</sub> Ge, TiB <sub>2</sub> , Mo                                    |
| Ge | Mo | V  | -17 | -19 | VB, Mo <sub>3</sub> Ge, MoB                                                  |
| Ge | Mo | Nb | 36  | -31 | NbB, Mo <sub>3</sub> Ge, MoB                                                 |
| Ge | Mo | Ta | 26  | -23 | TaB, Mo <sub>3</sub> Ge, MoB                                                 |
| Ge | Mo | W  | 20  | -9  | MoB, W, Mo <sub>3</sub> Ge, MoGe <sub>2</sub>                                |
| Ge | Mn | Cr | 47  | -10 | Mn <sub>2</sub> B, CrB, Mn <sub>3</sub> Ge, MnGe                             |
| Ge | Mn | Fe | 16  | -29 | Mn <sub>2</sub> B, MnGe, Fe <sub>2</sub> B                                   |
| Ge | Fe | Cr | 53  | -18 | Fe <sub>2</sub> B, FeGe, Cr <sub>3</sub> B <sub>3</sub> , Cr <sub>3</sub> Ge |
| Ge | Fe | Mn | 19  | -40 | Fe <sub>2</sub> B, FeGe, Mn <sub>2</sub> B                                   |
| Ge | Co | Mn | 27  | -9  | Co, CoB, CoGe, Mn <sub>2</sub> B                                             |
| Ge | Co | Fe | 39  | -13 | CoB, Co, CoGe, Fe <sub>2</sub> B                                             |

Table S7. Calculated structural information for predicted stable *o*-MAB phases,  $M'_4M''AB_2$ , listed in Table S5.

| <i>A</i> | <i>M'</i> | <i>M''</i> | <i>a</i> (Å) | <i>c</i> (Å) | Wyckoff sites                                                                                                                                    |
|----------|-----------|------------|--------------|--------------|--------------------------------------------------------------------------------------------------------------------------------------------------|
| Si       | Ti        | Mo         | 6.09359      | 11.43590     | Ti 16l (0.67618, 0.67618, 0.13157)<br>Mo 4c (0.00000, 0.00000, 0.00000)<br>Si 4a (0.00000, 0.00000, 0.25000)<br>B 8h (0.89246, 0.89246, 0.00000) |
| Si       | Ti        | Mn         | 5.87927      | 11.58850     | Ti 16l (0.67656, 0.67656, 0.13068)<br>Mn 4c (0.00000, 0.00000, 0.00000)<br>Si 4a (0.00000, 0.00000, 0.25000)<br>B 8h (0.88731, 0.88731, 0.00000) |
| Si       | Nb        | V          | 6.14802      | 11.63100     | Nb 16l (0.67077, 0.67077, 0.13583)<br>V 4c (0.00000, 0.00000, 0.00000)<br>Si 4a (0.00000, 0.00000, 0.25000)<br>B 8h (0.88186, 0.88186, 0.00000)  |
| Si       | Nb        | Cr         | 6.10266      | 11.59550     | Nb 16l (0.67063, 0.67063, 0.13614)<br>Cr 4c (0.00000, 0.00000, 0.00000)<br>Si 4a (0.00000, 0.00000, 0.25000)<br>B 8h (0.88061, 0.88061, 0.00000) |
| Si       | Ta        | V          | 6.11481      | 11.52270     | Ta 16l (0.66941, 0.66941, 0.13660)<br>V 4c (0.00000, 0.00000, 0.00000)<br>Si 4a (0.00000, 0.00000, 0.25000)<br>B 8h (0.87875, 0.87875, 0.00000)  |
| Si       | Ta        | Cr         | 6.06663      | 11.50100     | Ta 16l (0.66928, 0.66928, 0.13702)<br>Cr 4c (0.00000, 0.00000, 0.00000)<br>Si 4a (0.00000, 0.00000, 0.25000)<br>B 8h (0.87818, 0.87818, 0.00000) |
| Si       | Ta        | Mn         | 6.04995      | 11.51720     | Ta 16l (0.66910, 0.66910, 0.13737)<br>Mn 4c (0.00000, 0.00000, 0.00000)<br>Si 4a (0.00000, 0.00000, 0.25000)<br>B 8h (0.87903, 0.87903, 0.00000) |
| Si       | Mo        | V          | 5.97560      | 11.10880     | Mo 16l (0.66767, 0.66767, 0.13688)<br>V 4c (0.00000, 0.00000, 0.00000)<br>Si 4a (0.00000, 0.00000, 0.25000)<br>B 8h (0.87877, 0.87877, 0.00000)  |
| Si       | Mo        | Cr         | 5.93417      | 11.09640     | Mo 16l (0.66769, 0.66769, 0.13677)<br>Cr 4c (0.00000, 0.00000, 0.00000)<br>Si 4a (0.00000, 0.00000, 0.25000)<br>B 8h (0.87685, 0.87685, 0.00000) |
| Si       | Mo        | Mn         | 5.93248      | 11.13690     | Mo 16l (0.66896, 0.66896, 0.13607)<br>Mn 4c (0.00000, 0.00000, 0.00000)<br>Si 4a (0.00000, 0.00000, 0.25000)<br>B 8h (0.87918, 0.87918, 0.00000) |
| Si       | W         | Cr         | 5.95633      | 10.96220     | W 16l (0.66464, 0.66464, 0.13832)<br>Cr 4c (0.00000, 0.00000, 0.00000)<br>Si 4a (0.00000, 0.00000, 0.25000)<br>B 8h (0.87163, 0.87163, 0.00000)  |
| P        | Ti        | Cr         | 5.89048      | 11.32240     | Ti 16l (0.67620, 0.67620, 0.13318)<br>Cr 4c (0.00000, 0.00000, 0.00000)<br>P 4a (0.00000, 0.00000, 0.25000)<br>B 8h (0.88762, 0.88762, 0.00000)  |
| P        | Ti        | Mo         | 6.02784      | 11.31580     | Ti 16l (0.67516, 0.67516, 0.13451)<br>Mo 4c (0.00000, 0.00000, 0.00000)<br>P 4a (0.00000, 0.00000, 0.25000)<br>B 8h (0.89106, 0.89106, 0.00000)  |
| P        | Ti        | Mn         | 5.83625      | 11.34670     | Ti 16l (0.67492, 0.67492, 0.13430)<br>Mn 4c (0.00000, 0.00000, 0.00000)<br>P 4a (0.00000, 0.00000, 0.25000)<br>B 8h (0.88600, 0.88600, 0.00000)  |
| P        | Nb        | V          | 6.10357      | 11.52040     | Nb 16l (0.67047, 0.67047, 0.13798)<br>V 4c (0.00000, 0.00000, 0.00000)<br>P 4a (0.00000, 0.00000, 0.25000)<br>B 8h (0.88263, 0.88263, 0.00000)   |

|    |    |    |         |          |                                                                                                                                                  |
|----|----|----|---------|----------|--------------------------------------------------------------------------------------------------------------------------------------------------|
| P  | Nb | Cr | 6.05282 | 11.53200 | Nb 16l (0.67073, 0.67073, 0.13782)<br>Cr 4c (0.00000, 0.00000, 0.00000)<br>P 4a (0.00000, 0.00000, 0.25000)<br>B 8h (0.88094, 0.88094, 0.00000)  |
| P  | Nb | Mn | 6.02485 | 11.67340 | Nb 16l (0.67221, 0.67221, 0.13746)<br>Mn 4c (0.00000, 0.00000, 0.00000)<br>P 4a (0.00000, 0.00000, 0.25000)<br>B 8h (0.88413, 0.88413, 0.00000)  |
| P  | Ta | V  | 6.06752 | 11.43000 | Ta 16l (0.66905, 0.66905, 0.13861)<br>V 4c (0.00000, 0.00000, 0.00000)<br>P 4a (0.00000, 0.00000, 0.25000)<br>B 8h (0.87958, 0.87958, 0.00000)   |
| P  | Ta | Cr | 6.01376 | 11.44970 | Ta 16l (0.66940, 0.66940, 0.13869)<br>Cr 4c (0.00000, 0.00000, 0.00000)<br>P 4a (0.00000, 0.00000, 0.25000)<br>B 8h (0.87850, 0.87850, 0.00000)  |
| P  | Ta | W  | 6.12238 | 11.50550 | Ta 16l (0.66709, 0.66709, 0.14079)<br>W 4c (0.00000, 0.00000, 0.00000)<br>P 4a (0.00000, 0.00000, 0.25000)<br>B 8h (0.87986, 0.87986, 0.00000)   |
| P  | Ta | Mn | 5.97930 | 11.58650 | Ta 16l (0.67079, 0.67079, 0.13824)<br>Mn 4c (0.00000, 0.00000, 0.00000)<br>P 4a (0.00000, 0.00000, 0.25000)<br>B 8h (0.88153, 0.88153, 0.00000)  |
| P  | Mo | V  | 5.91680 | 11.14370 | Mo 16l (0.66999, 0.66999, 0.13735)<br>V 4c (0.00000, 0.00000, 0.00000)<br>P 4a (0.00000, 0.00000, 0.25000)<br>B 8h (0.88160, 0.88160, 0.00000)   |
| P  | Mo | Cr | 5.85706 | 11.23330 | Mo 16l (0.67062, 0.67062, 0.13711)<br>Cr 4c (0.00000, 0.00000, 0.00000)<br>P 4a (0.00000, 0.00000, 0.25000)<br>B 8h (0.88011, 0.88011, 0.00000)  |
| P  | Mo | Mn | 5.83579 | 11.31380 | Mo 16l (0.67203, 0.67203, 0.13680)<br>Mn 4c (0.00000, 0.00000, 0.00000)<br>P 4a (0.00000, 0.00000, 0.25000)<br>B 8h (0.88256, 0.88256, 0.00000)  |
| Ga | Ti | Mo | 6.10604 | 11.72840 | Ti 16l (0.67615, 0.67615, 0.12810)<br>Mo 4c (0.00000, 0.00000, 0.00000)<br>Ga 4a (0.00000, 0.00000, 0.25000)<br>B 8h (0.89273, 0.89273, 0.00000) |
| Ga | Ta | V  | 6.15337 | 11.66420 | Ta 16l (0.66929, 0.66929, 0.13310)<br>V 4c (0.00000, 0.00000, 0.00000)<br>Ga 4a (0.00000, 0.00000, 0.25000)<br>B 8h (0.87611, 0.87611, 0.00000)  |
| Ga | Ta | Cr | 6.09898 | 11.64560 | Ta 16l (0.66890, 0.66890, 0.13403)<br>Cr 4c (0.00000, 0.00000, 0.00000)<br>Ga 4a (0.00000, 0.00000, 0.25000)<br>B 8h (0.87573, 0.87573, 0.00000) |
| Ga | Ta | W  | 6.21049 | 11.67240 | Ta 16l (0.66664, 0.66664, 0.13604)<br>W 4c (0.00000, 0.00000, 0.00000)<br>Ga 4a (0.00000, 0.00000, 0.25000)<br>B 8h (0.87756, 0.87756, 0.00000)  |
| Ge | Ti | Mo | 6.10582 | 11.59260 | Ti 16l (0.67572, 0.67572, 0.12941)<br>Mo 4c (0.00000, 0.00000, 0.00000)<br>Ge 4a (0.00000, 0.00000, 0.25000)<br>B 8h (0.89202, 0.89202, 0.00000) |
| Ge | Ti | W  | 6.09311 | 11.64180 | Ti 16l (0.67529, 0.67529, 0.12969)<br>W 4c (0.00000, 0.00000, 0.00000)<br>Ge 4a (0.00000, 0.00000, 0.25000)<br>B 8h (0.89053, 0.89053, 0.00000)  |
| Ge | Ti | Mn | 5.88630 | 11.78260 | Ti 16l (0.67613, 0.67613, 0.12828)<br>Mn 4c (0.00000, 0.00000, 0.00000)<br>Ge 4a (0.00000, 0.00000, 0.25000)<br>B 8h (0.88677, 0.88677, 0.00000) |

|    |    |    |         |          |                                                                                                                                                  |
|----|----|----|---------|----------|--------------------------------------------------------------------------------------------------------------------------------------------------|
| Ge | Nb | V  | 6.18025 | 11.71940 | Nb 16l (0.66948, 0.66948, 0.13393)<br>V 4c (0.00000, 0.00000, 0.00000)<br>Ge 4a (0.00000, 0.00000, 0.25000)<br>B 8h (0.87990, 0.87990, 0.00000)  |
| Ge | Nb | Cr | 6.13063 | 11.70240 | Nb 16l (0.66883, 0.66883, 0.13432)<br>Cr 4c (0.00000, 0.00000, 0.00000)<br>Ge 4a (0.00000, 0.00000, 0.25000)<br>B 8h (0.87778, 0.87778, 0.00000) |
| Ge | Ta | V  | 6.14965 | 11.59720 | Ta 16l (0.66786, 0.66786, 0.13468)<br>V 4c (0.00000, 0.00000, 0.00000)<br>Ge 4a (0.00000, 0.00000, 0.25000)<br>B 8h (0.87637, 0.87637, 0.00000)  |
| Ge | Ta | Cr | 6.09706 | 11.59320 | Ta 16l (0.66731, 0.66731, 0.13520)<br>Cr 4c (0.00000, 0.00000, 0.00000)<br>Ge 4a (0.00000, 0.00000, 0.25000)<br>B 8h (0.87508, 0.87508, 0.00000) |
| Ge | Ta | Mn | 6.08346 | 11.61750 | Ta 16l (0.66741, 0.66741, 0.13544)<br>Mn 4c (0.00000, 0.00000, 0.00000)<br>Ge 4a (0.00000, 0.00000, 0.25000)<br>B 8h (0.87690, 0.87690, 0.00000) |

Table S8. Atomic radius and electronegativity considered for  $M$  and  $A$ .<sup>24, 25</sup>

| $M$ | Atomic radius $r_M$ (Å) | Electronegativity $\rho_M$<br>(Pauling scale) | $A$ | Atomic radius $r_A$ (Å) | Electronegativity $\rho_A$<br>(Pauling scale) |
|-----|-------------------------|-----------------------------------------------|-----|-------------------------|-----------------------------------------------|
| Sc  | 1.62                    | 1.36                                          | Al  | 1.43                    | 1.61                                          |
| Y   | 1.80                    | 1.22                                          | Si  | 1.38                    | 1.90                                          |
| Ti  | 1.47                    | 1.54                                          | P   | 1.15                    | 2.19                                          |
| Zr  | 1.60                    | 1.33                                          | Ga  | 1.40                    | 1.81                                          |
| Hf  | 1.59                    | 1.30                                          | Ge  | 1.44                    | 2.01                                          |
| V   | 1.35                    | 1.63                                          |     |                         |                                               |
| Nb  | 1.46                    | 1.60                                          |     |                         |                                               |
| Ta  | 1.46                    | 1.50                                          |     |                         |                                               |
| Cr  | 1.29                    | 1.66                                          |     |                         |                                               |
| Mo  | 1.39                    | 2.16                                          |     |                         |                                               |
| W   | 1.39                    | 2.36                                          |     |                         |                                               |
| Mn  | 1.27                    | 1.55                                          |     |                         |                                               |
| Fe  | 1.26                    | 1.83                                          |     |                         |                                               |
| Co  | 1.25                    | 1.88                                          |     |                         |                                               |



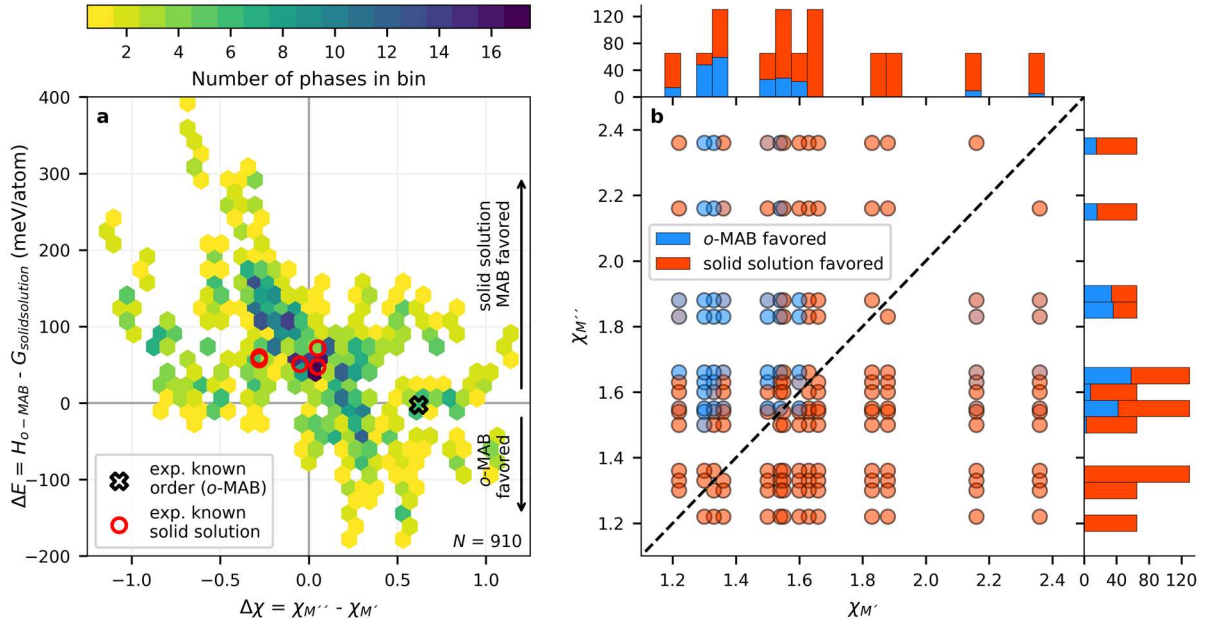

Figure S6. (a) Hexbin plot showing the energy difference of chemical order ( $\Delta H_{o-MAB}$ ) and chemical disorder ( $\Delta G_{\text{solid solution}}$  at 2000 K) as function of electronegativity difference,  $\Delta\chi$ , of  $M''$  and  $M'$  for all 910 compositions. The color of a hexabin represent the number of stable phases. Experimentally known *o*-MAB phase is indicated by a black cross and solid solution MAB phases by red circles. (b) Electronegativity  $\chi$  of  $M''$  as function of  $M'$  for stable composition where the color of each data point represents if order (blue) or solid solution is lowest in energy for a given composition. Histograms are given for each axis with a bin size of 0.05.

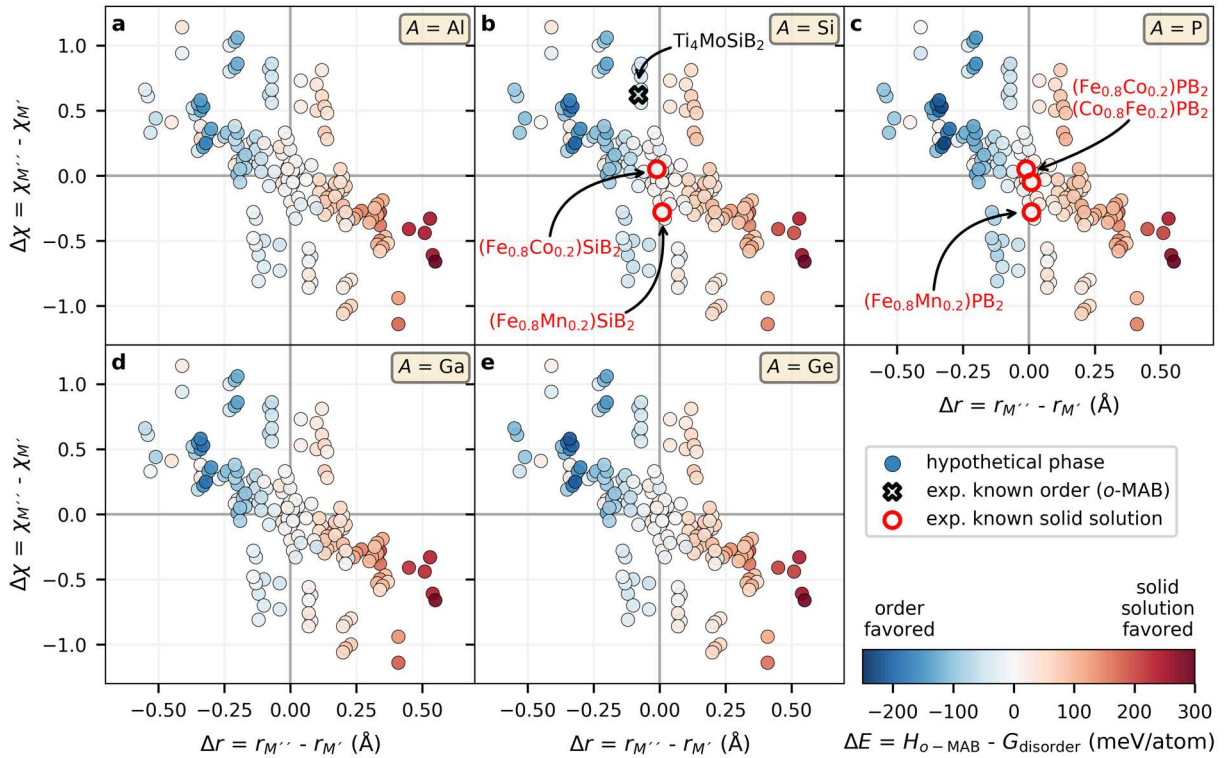

Figure S7. Electronegativity difference of  $M''$  and  $M'$  as function of size difference of  $M'$  and  $M''$  for  $A$  being (a) Al, (b) Si, (c) P, (d) Ga and (e) Ge. The color of each data point represents the energy difference  $\Delta E$  between chemically ordered  $M'_4M''AB_2$  and solid solution  $(M'_{0.8}M''_{0.2})_5AB_2$  where blue color indicate favor for ordered *o*-MAB and red favor solid solution  $(M'_{0.8}M''_{0.2})_5AB_2$ .

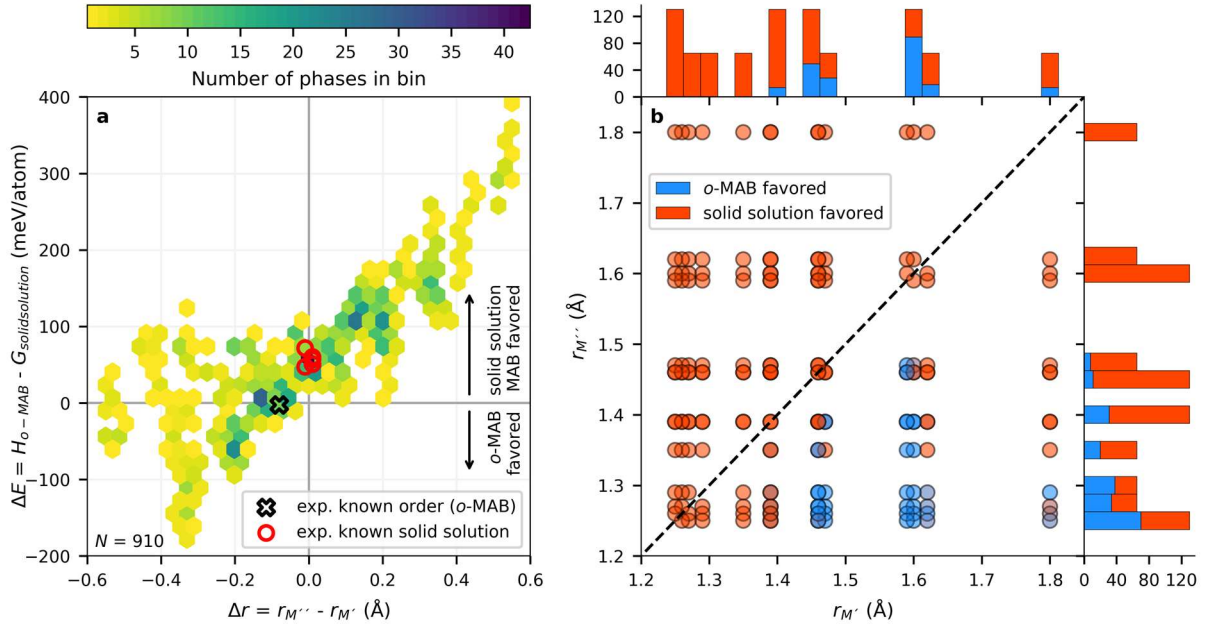

Figure S8. (a) Hexbin plot showing the energy difference of chemical order ( $\Delta H_{o-MAB}$ ) and chemical disorder ( $\Delta G_{\text{solid solution}}$  at 2000 K) as function of size difference,  $\Delta r$ , of  $M''$  and  $M'$  for all 910 compositions. The color of a hexabin represent the number of stable phases. The experimentally known *o*-MAB phase is indicated by a black cross and solid solution MAB phases by red circles. (b) Atomic size  $r$  of  $M''$  as function of  $M'$  for stable composition where the color of each data point represents if order (blue) or solid solution is lowest in energy for a given composition. Histograms are given for each axis with a bin size of 0.025 Å.

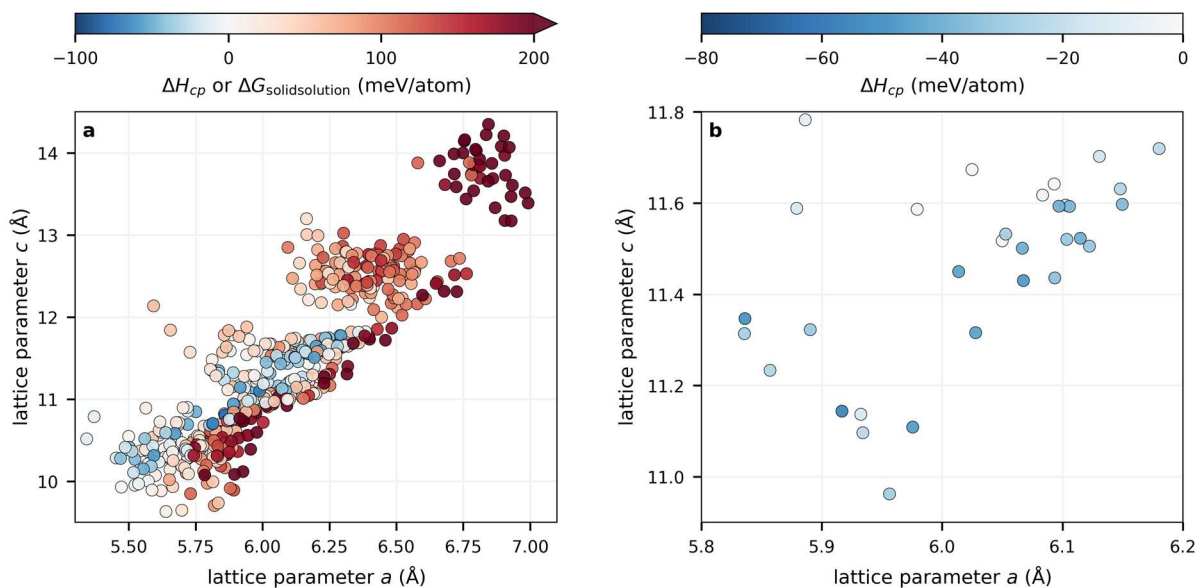

Figure S9. Calculated lattice parameters  $a$  and  $c$  for (a) all 910 compositions and (b) the 36 predicted stable  $o$ -MAB phases. Coloring of each data point refers to the calculated formation enthalpy or free Gibbs free energy of formation where blue indicate stable and red not stable.

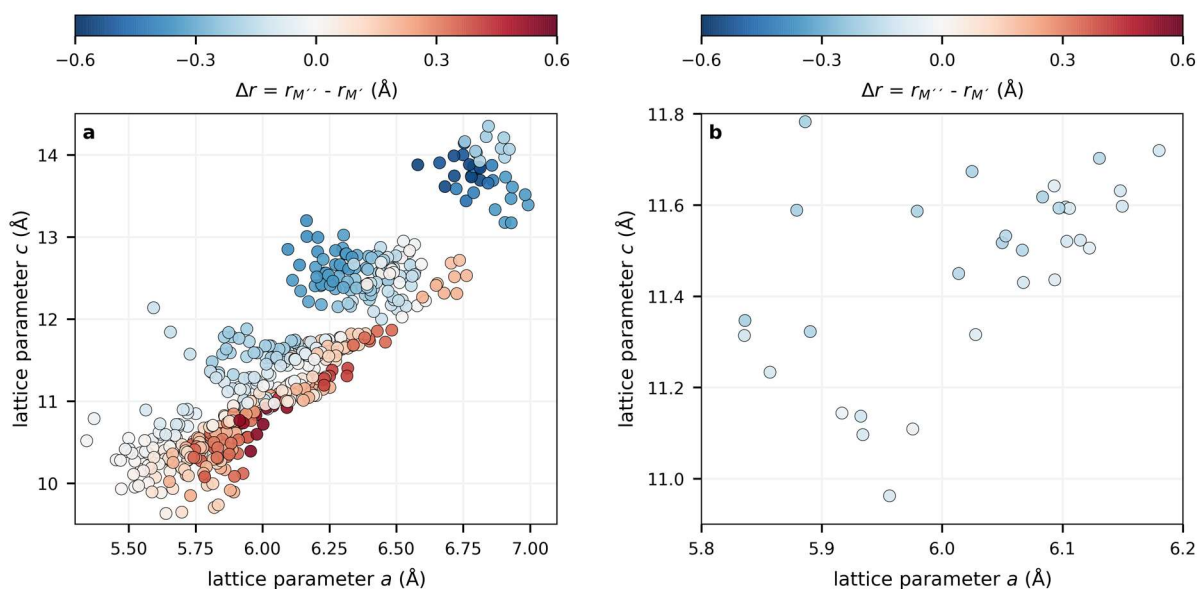

Figure S10. Calculated lattice parameters  $a$  and  $c$  for (a) all 910 compositions and (b) the 36 predicted stable  $o$ -MAB phases. Coloring of each data point refers to the size difference,  $\Delta r$ , of  $M''$  and  $M'$  where blue indicate  $r_{M''} < r_{M'}$  and red  $r_{M''} > r_{M'}$ .

## SUPPLEMENTARY REFERENCES

- (1) Nunes, C. A.; de Lima, B. B.; Coelho, G. C.; Suzuki, P. A., Isothermal Section of the V-Si-B System at 1600 °C in the V-VSi<sub>2</sub>-VB Region. *J. Phase Equilib. Diff.* **2009**, *30*, 345-350.
- (2) Rodrigues, G.; Nunes, C. A.; Suzuki, P. A.; Coelho, G. C., Lattice parameters and thermal expansion of the T<sub>2</sub>-phase of the Nb-Si-B system investigated by high-temperature X-ray diffraction. *Intermetallics* **2004**, *12*, 181-188.
- (3) Brauner, A.; Nunes, C. A.; Bortolozzo, A. D.; Rodrigues, G.; Machado, A. J. S., Superconductivity in the new Nb<sub>5</sub>Si<sub>3-x</sub>B<sub>x</sub> phase. *Solid State Commun.* **2009**, *149*, 467-470.
- (4) Kudielka, H.; Nowotny, H.; Findeisen, G., Untersuchungen in den Systemen: V-B, Nb-B, V-B-Si und Ta-B-Si. *Monatsh. Chem.* **1957**, *88*, 1048-1055.
- (5) Nowotny, H.; Lux, B.; Kudielka, H., Das Verhalten metallreicher, hochschmelzender Silizide gegenüber Bor, Kohlenstoff, Stickstoff und Sauerstoff. *Monatsh. Chem.* **1956**, *87*, 447-470.
- (6) Silvestroni, L.; Sciti, D., Densification of ZrB<sub>2</sub>-TaSi<sub>2</sub> and HfB<sub>2</sub>-TaSi<sub>2</sub> Ultra-High-Temperature Ceramic Composites. *J. Am. Ceram. Soc.* **2011**, *94*, 1920-1930.
- (7) Nowotny, H.; Dimakopoulou, E.; Kudielka, H., Untersuchungen in den Dreistoffsystemen: Molybdän-Silizium-Bor, Wolfram-Silizium-Bor und in dem System: VSi<sub>2</sub>-TaSi<sub>2</sub>. *Monatsh. Chem.* **1957**, *88*, 180-192.
- (8) MacHado, A. J. S.; Costa, A. M. S.; Nunes, C. A.; Dos Santos, C. A. M.; Grant, T.; Fisk, Z., Superconductivity in Mo<sub>5</sub>SiB<sub>2</sub>. *Solid State Commun.* **2011**, *151*, 1455-1458.
- (9) Fukuma, M.; Kawashima, K.; Maruyama, M.; Akimitsu, J., Superconductivity in W<sub>5</sub>SiB<sub>2</sub> with the T<sub>2</sub> Phase Structure. *Journal of the Physical Society of Japan* **2011**, *80*, 024702.
- (10) de Almeida, D. M.; Bormio-Nunes, C.; Nunes, C. A.; Coelho, A. A.; Coelho, G. C., Magnetic characterization of Mn<sub>5</sub>SiB<sub>2</sub> and Mn<sub>5</sub>Si<sub>3</sub> phases. *J. Magn. Magn. Mater.* **2009**, *321*, 2578-2581.
- (11) Aronsson, B.; Engström, I., X-Ray Investigations on M-Si-B Systems (M = Mn, Fe, Co). II. Some Features of the Fe-Si-B and Mn-Si-B Systems. *Acta Chem Scand A* **1960**, *14*, 1403-1413.
- (12) McGuire, M. A.; Parker, D. S., Magnetic and structural properties of ferromagnetic Fe<sub>5</sub>PB<sub>2</sub> and Fe<sub>5</sub>SiB<sub>2</sub> and effects of Co and Mn substitutions. *J. Appl. Phys.* **2015**, *118*, 163903.
- (13) Werwiński, M.; Kontos, S.; Gunnarsson, K.; Svedlindh, P.; Cedervall, J.; Höglin, V.; Sahlberg, M.; Edström, A.; Eriksson, O.; Ruzs, J., Magnetic properties of Fe<sub>5</sub>SiB<sub>2</sub> and its alloys with P, S, and Co. *Phys. Rev. B* **2016**, *93*, 174412.
- (14) Hedlund, D.; Cedervall, J.; Edström, A.; Werwiński, M.; Kontos, S.; Eriksson, O.; Ruzs, J.; Svedlindh, P.; Sahlberg, M.; Gunnarsson, K., Magnetic properties of the Fe<sub>5</sub>SiB<sub>2</sub>-Fe<sub>5</sub>PB<sub>2</sub> system. *Phys. Rev. B* **2017**, *96*, 094433.
- (15) Hirian, R.; Isnard, O.; Pop, V.; Benea, D., Investigations on the magnetic properties of the Fe<sub>5-x</sub>Co<sub>x</sub>SiB<sub>2</sub> alloys by experimental and band structure calculation methods. *J. Magn. Magn. Mater.* **2020**, *505*, 166748.
- (16) Corrêa, L. E.; da Luz, M. S.; de Lima, B. S.; Cigarroa, O. V.; da Silva, A. A. A. P.; Coelho, G. C.; Fisk, Z.; Machado, A. J. S., Ta<sub>5</sub>GeB<sub>2</sub>: New T<sub>2</sub> superconductor phase. *J. Alloys Compd.* **2016**, *660*, 44-47.
- (17) Baurecht, H. E.; Boller, H.; Nowotny, H., Röntgenographische Untersuchungen in den Dreistoffen Cr-P-C, Cr-As-C und Cr-P-B. *Monatsh. Chem.* **1971**, *102*, 373-384.
- (18) McGuire, M. A.; Parker, D. S., Superconductivity at 9 K in Mo<sub>5</sub>PB<sub>2</sub> with evidence for multiple gaps. *Phys. Rev. B* **2016**, *93*, 064507.
- (19) Il'nitskaya, O. N.; Kuz'ma, Y. B., Diagram of phase equilibria in the MO-P-B system in the range 0-0.67 at. fraction of P. *Soviet Powder Metallurgy and Metal Ceramics* **1985**, *24*, 226-228.
- (20) Rundqvist, S., X-ray investigations of the ternary system Fe-P-B. Some features of the systems Cr-P-B, Mn-P-B, Co-PB and Ni-P-B. *Acta Chem. Scand* **1962**, *16*, 1-19.
- (21) Cedervall, J.; Nonnet, E.; Hedlund, D.; Häggström, L.; Ericsson, T.; Werwiński, M.; Edström, A.; Ruzs, J.; Svedlindh, P.; Gunnarsson, K.; Sahlberg, M., Influence of Cobalt Substitution on the Magnetic Properties of Fe<sub>5</sub>PB<sub>2</sub>. *Inorg. Chem.* **2018**, *57*, 777-784.
- (22) Fukuma, M.; Kawashima, K.; Akimitsu, J. In *Substitution effect on the superconductivity in W<sub>5-x</sub>Ta<sub>x</sub>SiB<sub>2</sub> with the T<sub>2</sub> phase structure*, Journal of Physics: Conference Series, 2012.
- (23) Dahlqvist, M.; Zhou, J.; Persson, I.; Ahmed, B.; Lu, J.; Halim, J.; Tao, Q.; Palisaitis, J.; Thörnberg, J.; Helmer, P.; Hultman, L.; Persson, P. O. Å.; Rosen, J., Out-Of-Plane Ordered Laminate Borides and Their 2D Ti-Based Derivative from Chemical Exfoliation. *Adv. Mater.* **2020**, *accepted for publication*.
- (24) Greenwood, N. N.; Earnshaw, A., *Chemistry of the Elements*. 2nd ed.; Butterworth-Heinemann: 1997.
- (25) Huheey, J. E.; Keiter, E. A.; Keiter, R. L., *Inorganic Chemistry : Principles of Structure and Reactivity*. 4th ed.; HarperCollins: New York, USA, 1993.
